# Supplementary material for: EGFR Mutation Status and First-Line Treatment in Patients with Stage III/IV Non–Small Cell Lung Cancer in Germany: An Observational Study
Source: Oxford University Press journal article supplement (doi:10.1158/1055-9965.epi-14-1149), 2015-06-12
Supplement: 10559965epi141149-sup-139141_2_supp_2967136_nnx7s0.docx [file 10559965epi141149-sup-139141_2_supp_2967136_nnx7s0.docx]

**Supplemental Table S3.** Tissue source and testing method used for *EGFR* mutation analysis

|  | **Number (%) of tests (*n* = 4,200)** | **Number (%) of *EGFR* Mut+ results** |
| --- | --- | --- |
| **Tissue used for testinga** |  |  |
| Primary tumor | 3,436 (81.8) | 320 (9.3) |
| Lymph node | 279 (6.6) | 32 (11.5) |
| Metastases | 425 (10.1) | 70 (16.5) |
| Unknown | 60 (1.4) | 10 (16.7) |

aMultiple answers were permitted.
Abbreviation: *EGFR* Mut+, *EGFR* mutation positive.
